# Supplementary material for: Fungal Whole-Genome Sequencing for Species Identification: From Test Development to Clinical Utilization
Source: MDPI journal article supplement (doi:10.3390/jof9020183), 2023-01-29

**Supplemental Table S1. List of fungal isolates and related information.**

| Study ID | Organism Type       | Original ID                        | Source                  | Method Used for Original ID     | WGS ID                                                                  | Marker/Method Used for WGS ID |
|----------|---------------------|------------------------------------|-------------------------|---------------------------------|-------------------------------------------------------------------------|-------------------------------|
| UCLA_024 | Mold - Dematiaceous | <i>Scedosporium apiospermum</i>    | Eye, Cornea             | Microscopic morphology          | <i>Scedosporium dehoogii</i>                                            | ITS                           |
| UCLA_058 | Mold - Mucorales    | <i>Lichtheimia ornata</i>          | N/A                     | DNA Sequencing - UT San Antonio | <i>Lichtheimia ornata</i>                                               | 28S                           |
| UCLA_076 | Mold - Mucorales    | <i>Rhizomucor pusillus</i>         | N/A                     | DNA Sequencing - UT San Antonio | <i>Rhizomucor pusillus</i>                                              | 28S                           |
| UCLA_144 | Mold - Dematiaceous | <i>Scedosporium apiospermum</i>    | Eye, Cornea             | Microscopic morphology          | <i>Scedosporium dehoogii</i>                                            | ITS                           |
| UCLA_145 | Yeast               | <i>Candida auris</i>               | Swab, Inguinal/Axillary | MALDI-TOF MS                    | <i>Candida auris</i>                                                    | ITS                           |
| UCLA_146 | Mold - Dimorphic    | <i>Blastomyces dermatitidis</i>    | Bronchoalveolar Lavage  | Accuprobe                       | <i>Blastomyces dermatitidis</i>                                         | ITS                           |
| UCLA_147 | Yeast               | <i>Candida auris</i>               | N/A                     | Reference Isolate               | <i>Candida auris</i>                                                    | ITS                           |
| UCLA_148 | Mold - Mucorales    | <i>Syncephalastrum spp.</i>        | Tissue, Abdomen         | Microscopic morphology          | <i>Syncephalastrum racemosum</i>                                        | 28S                           |
| UCLA_149 | Yeast               | <i>Cryptococcus neoformans</i>     | N/A                     | Reference Isolate (ATCC 32045)  | <i>Cryptococcus neoformans</i>                                          | ITS                           |
| UCLA_150 | Mold - Hyaline      | <i>Fusarium proliferatum</i>       | Tracheal Aspirate       | DNA Sequencing - UT San Antonio | <i>Fusarium proliferatum</i>                                            | ITS                           |
| UCLA_151 | Mold - Hyaline      | <i>Paecilomyces variotti</i>       | Endotracheal            | Microscopic morphology          | <i>Paecilomyces variotti</i>                                            | ITS                           |
| UCLA_154 | Yeast               | <i>Candida auris</i>               | Tracheal Suction        | MALDI-TOF MS                    | <i>Candida auris</i>                                                    | ITS                           |
| UCLA_156 | Yeast               | <i>Candida haemulonii</i>          | N/A                     | Reference Isolate (CDC AR0393)  | <i>Candida spp.</i> most closely related to <i>C. haemulonii</i>        | ITS                           |
| UCLA_158 | Mold - Dematiaceous | <i>Scedosporium prolificans</i>    | Bronchoalveolar Lavage  | Microscopic morphology          | <i>Scedosporium prolificans</i>                                         | ITS                           |
| UCLA_160 | Mold - Hyaline      | <i>Aspergillus terreus</i>         | Tracheal Aspirate       | Microscopic morphology          | <i>Aspergillus terreus</i>                                              | K-mer Analysis & beta-tubulin |
| UCLA_164 | Dermatophyte        | <i>Trichophyton tonsurans</i>      | Skin Scraping           | Microscopic morphology          | <i>Trichophyton tonsurans</i>                                           | ITS                           |
| UCLA_261 | Mold - Hyaline      | <i>Aspergillus niger</i>           | Bronchoalveolar Lavage  | Microscopic morphology          | <i>Aspergillus tubingensis</i>                                          | K-mer Analysis & beta-tubulin |
| UCLA_262 | Mold - Hyaline      | <i>Aspergillus niger</i>           | Tracheal Aspirate       | Microscopic morphology          | <i>Aspergillus niger</i>                                                | K-mer Analysis & beta-tubulin |
| UCLA_274 | Mold - Hyaline      | <i>Aspergillus nidulans</i>        | Expectorated Sputum     | Microscopic morphology          | <i>Aspergillus quadrilineatus</i>                                       | K-mer Analysis & beta-tubulin |
| UCLA_273 | Mold - Dermatophyte | <i>Trichophyton mentagrophytes</i> | Nails, Toe              | Microscopic morphology          | <i>Trichophyton mentagrophytes</i>                                      | ITS                           |
| UCLA_272 | Mold - Dermatophyte | <i>Trichophyton rubrum</i>         | Biopsy, Leg             | Microscopic morphology          | <i>Trichophyton rubrum</i>                                              | ITS                           |
| UCLA_280 | Mold - Hyaline      | <i>Aspergillus terreus</i>         | Expectorated Sputum     | Microscopic morphology          | <i>Aspergillus terreus</i>                                              | K-mer Analysis & beta-tubulin |
| UCLA_281 | Mold - Hyaline      | <i>Aspergillus fumigatus</i>       | Swab, Maxillary Sinus   | Microscopic morphology          | <i>Aspergillus fumigatus</i>                                            | K-mer Analysis & beta-tubulin |
| UCLA_283 | Mold - Mucorales    | <i>Syncephalastrum spp.</i>        | N/A                     | Reference Isolate               | <i>Syncephalastrum monosporum</i>                                       | 28S                           |
| UCLA_287 | Mold - Dematiaceous | <i>Alternaria spp.</i>             | Nails, Toe              | MALDI-TOF MS                    | <i>Alternaria alternata/cerealis/alstroemeriae/gossypina/tenuissima</i> | ITS                           |
| UCLA_289 | Mold - Hyaline      | <i>Aspergillus fumigatus</i>       | Pleural Fluid           | Microscopic morphology          | <i>Aspergillus fumigatus</i>                                            | K-mer Analysis & beta-tubulin |

|          |                        |                                          |                        |                                 |                                                                    |                               |
|----------|------------------------|------------------------------------------|------------------------|---------------------------------|--------------------------------------------------------------------|-------------------------------|
| UCLA_291 | Mushroom-forming Fungi | <i>Coprinellus micaceus</i>              | Bronchoalveolar lavage | MALDI-TOF MS                    | <i>Coprinellus</i> spp. most closely related to <i>C. micaceus</i> | ITS                           |
| UCLA_292 | Mold - Hyaline         | <i>Fusarium</i> spp.                     | Blood                  | Microscopic morphology          | <i>Fusarium dimerum</i>                                            | ITS                           |
| UCLA_293 | Mold - Dimorphic       | <i>Coccidioides immitis</i>              | CSF                    | Accuprobe                       | <i>Coccidioides immitis</i>                                        | ITS                           |
| UCLA_294 | Mold - Dimorphic       | <i>Coccidioides immitis</i>              | Expectorated Sputum    | Accuprobe                       | <i>Coccidioides immitis</i>                                        | ITS                           |
| UCLA_295 | Mold - Dimorphic       | <i>Coccidioides immitis</i>              | Synovial Fluid         | Accuprobe                       | <i>Coccidioides immitis</i>                                        | ITS                           |
| UCLA_296 | Mold - Hyaline         | <i>Scopulariopsis brevicaulis</i>        | Swab, Sinus            | Microscopic morphology          | <i>Scopulariopsis brevicaulis</i>                                  | ITS                           |
| UCLA_297 | Mold - Hyaline         | <i>Aspergillus sydowii</i>               | Nails, Finger          | Microscopic morphology          | <i>Aspergillus sydowii</i>                                         | K-mer Analysis & beta-tubulin |
| UCLA_299 | Mold - Dimorphic       | <i>Sporothrix schenckii</i>              | Synovial Fluid         | Microscopic morphology          | <i>Sporothrix schenckii</i>                                        | ITS                           |
| UCLA_300 | Mold - Dematiaceous    | <i>Bipolaris</i> spp.                    | Induced Sputum         | Microscopic morphology          | <i>Bipolaris spicifera</i>                                         | ITS                           |
| UCLA_301 | Mold - Dematiaceous    | <i>Exophiala dermatitidis</i>            | Bronchoalveolar lavage | Microscopic morphology          | <i>Exophiala dermatitidis</i>                                      | ITS                           |
| UCLA_302 | Mold - Mucorales       | <i>Mucor</i> spp.                        | Tissue, Thigh          | Microscopic morphology          | <i>Mucor circinelloides</i>                                        | 28S                           |
| UCLA_303 | Mold - Mucorales       | <i>Rhizopus</i> spp.                     | Swab, Bronchus         | Microscopic morphology          | <i>Rhizopus microsporus</i>                                        | 28S                           |
| UCLA_305 | Mold - Hyaline         | <i>Aspergillus flavus-oryzae</i>         | Exudate, Earlobe       | Microscopic morphology          | <i>Aspergillus flavus</i>                                          | K-mer Analysis & beta-tubulin |
| UCLA_306 | Mold - Hyaline         | <i>Aspergillus ustus</i>                 | N/A                    | Reference Isolate               | <i>Aspergillus calidoustus</i>                                     | K-mer Analysis & beta-tubulin |
| UCLA_298 | Mold - Dematiaceous    | <i>Exophiala dermatitidis</i>            | Expectorated Sputum    | Microscopic morphology          | <i>Exophiala dermatitidis</i>                                      | ITS                           |
| UCLA_304 | Mold - Hyaline         | <i>Myrmecridium schulzeri</i>            | Endotracheal           | Microscopic morphology          | <i>Myrmecridium schulzeri</i>                                      | ITS                           |
| UCLA_307 | Mold - Mucorales       | <i>Circinella</i> spp.                   | N/A                    | DNA Sequencing - UT San Antonio | <i>Circinella muscae</i>                                           | 28S                           |
| UCLA_308 | Mold - Dermatophyte    | <i>Neoscytalidium dimidiatum</i>         | N/A                    | Reference Isolate               | <i>Neoscytalidium dimidiatum</i>                                   | ITS                           |
| UCLA_309 | Mold - Mucorales       | <i>Mucor</i> spp.                        | Bone, Foot             | Microscopic morphology          | <i>Mucor circinelloides</i>                                        | 28S                           |
| UCLA_310 | Mold - Mucorales       | <i>Rhizopus</i> spp.                     | Bronchoalveolar lavage | Microscopic morphology          | <i>Rhizopus arrhizus (oryzae)</i>                                  | 28S                           |
| UCLA_311 | Mold - Dimorphic       | <i>Sporothrix schenckii</i>              | N/A                    | Reference Isolate               | N/A                                                                | N/A                           |
| UCLA_312 | Mold - Hyaline         | <i>Aspergillus flavus-oryzae</i>         | Bronchial Wash         | Microscopic morphology          | <i>Aspergillus flavus</i>                                          | K-mer Analysis & beta-tubulin |
| UCLA_316 | Mold - Dermatophyte    | <i>Epidermophyton floccosum</i>          | N/A                    | Reference Isolate               | <i>Epidermophyton floccosum</i>                                    | ITS                           |
| UCLA_317 | Mold - Dermatophyte    | <i>Microsporum audouinii</i>             | N/A                    | Reference Isolate               | <i>Microsporum audouinii</i>                                       | ITS                           |
| UCLA_318 | Mold - Dermatophyte    | <i>Microsporum canis</i>                 | N/A                    | Reference Isolate               | <i>Microsporum canis</i>                                           | ITS                           |
| UCLA_319 | Mold - Dermatophyte    | <i>Microsporum gypseum</i>               | N/A                    | Reference Isolate               | <i>Microsporum gypseum</i>                                         | ITS                           |
| UCLA_320 | Yeast                  | <i>Blastobotrys raffinosisfermentans</i> | Swab, Sternum          | DNA Sequencing - UT San Antonio | <i>Blastobotrys raffinosisfermentans</i>                           | ITS                           |
| UCLA_321 | Yeast                  | <i>Blastobotrys raffinosisfermentans</i> | Pleural Fluid          | DNA Sequencing - UT San Antonio | <i>Blastobotrys raffinosisfermentans</i>                           | ITS                           |
| UCLA_371 | Yeast                  | <i>Rhodotorula</i> spp.                  | N/A                    | Reference Isolate               | <i>Rhodotorula mucilaginosa</i>                                    | ITS                           |
| UCLA_372 | Yeast                  | <i>Candida kefyr</i>                     | N/A                    | Reference Isolate (CDC AR0588)  | <i>Candida kefyr</i>                                               | ITS                           |

|          |                     |                                 |                        |                                |                                          |                               |
|----------|---------------------|---------------------------------|------------------------|--------------------------------|------------------------------------------|-------------------------------|
| UCLA_373 | Yeast               | <i>Candida guilliermondii</i>   | N/A                    | Reference Isolate (CDC AR0590) | <i>Candida guilliermondii</i>            | ITS                           |
| UCLA_374 | Yeast               | <i>Candida tropicalis</i>       | N/A                    | Reference Isolate (CDC AR3045) | <i>Candida tropicalis</i>                | ITS                           |
| UCLA_378 | Yeast               | <i>Candida duobushaemulonii</i> | N/A                    | Reference Isolate (CDC AR0391) | <i>Candida duobushaemulonii</i>          | ITS                           |
| UCLA_379 | Yeast               | <i>Saccharomyces cerevisiae</i> | N/A                    | Reference Isolate (CDC AR0399) | <i>Saccharomyces cerevisiae</i>          | ITS                           |
| UCLA_380 | Yeast               | <i>Candida parapsilosis</i>     | N/A                    | Reference Isolate (CDC AR0339) | <i>Candida parapsilosis</i>              | ITS                           |
| UCLA_415 | Yeast               | <i>Cryptococcus albidus</i>     | Blood                  | API                            | <i>Cryptococcus liquefaciens</i>         | ITS                           |
| UCLA_417 | Mold - Hyaline      | <i>Aspergillus terreus</i>      | Bronchoalveolar Lavage | Microscopic morphology         | <i>Aspergillus terreus</i>               | K-mer Analysis & beta-tubulin |
| UCLA_423 | Yeast               | <i>Candida fermentati</i>       | Induced Sputum         | MALDI-TOF MS                   | <i>Candida fermentati</i>                | ITS                           |
| UCLA_424 | Yeast               | <i>Candida spp.</i>             | Blood                  | MALDI-TOF MS                   | <i>Candida dubliniensis</i>              | ITS                           |
| UCLA_425 | Yeast               | <i>Candida spp.</i>             | Blood                  | MALDI-TOF MS                   | <i>Candida dubliniensis</i>              | ITS                           |
| UCLA_429 | Yeast               | <i>Candida fermentati</i>       | Induced Sputum         | MALDI-TOF MS                   | <i>Candida fermentati</i>                | ITS                           |
| UCLA_430 | Yeast               | <i>Candida fermentati</i>       | Nails, Finger          | MALDI-TOF MS                   | <i>Candida fermentati</i>                | ITS                           |
| UCLA_530 | Yeast               | <i>Cryptococcus gattii</i>      | N/A                    | Reference Isolate (ATCC 4560)  | <i>Cryptococcus gattii</i>               | ITS                           |
| UCLA_531 | Yeast               | <i>Cryptococcus laurentii</i>   | N/A                    | Reference Isolate (ATCC 18803) | <i>Cryptococcus laurentii</i>            | ITS                           |
| UCLA_536 | Mold - Hyaline      | <i>Aspergillus fumigatus</i>    | Wound, Chest           | Microscopic morphology         | <i>Aspergillus fumigatus</i>             | K-mer Analysis & beta-tubulin |
| UCLA_581 | Mold - Hyaline      | <i>Penicillium spp.</i>         | N/A                    | Reference Isolate              | <i>Penicillium solitum</i>               | ITS                           |
| UCLA_582 | Mold - Hyaline      | <i>Trichoderma spp.</i>         | N/A                    | Reference Isolate              | <i>Trichoderma harzianum/lixi</i>        | ITS                           |
| UCLA_583 | Mold - Dematiaceous | <i>Curvularia spp.</i>          | N/A                    | Reference Isolate              | <i>Curvularia lunata/hominis/platzii</i> | ITS                           |
| UCLA_600 | Mold - Dimorphic    | <i>Histoplasma capsulatum</i>   | Tissue, Lymph Node     | MALDI-TOF MS                   | <i>Histoplasma capsulatum</i>            | ITS                           |

N/A=Not Applicable, CSF=Cerebrospinal Fluid

**Supplemental Table S2. Impact of fungal isolate pre-treatment methods on organism viability.**

| Organism                        | Heat (100°C, 15min) +<br>bead beat | Heat (100°C, 30min) +<br>bead beat | 70% EtOH +<br>bead beat | 70% EtOH + Heat (100°C,<br>30min) + bead beat |
|---------------------------------|------------------------------------|------------------------------------|-------------------------|-----------------------------------------------|
| <i>Aspergillus brasiliensis</i> | Growth                             | Growth                             | No growth               | No growth                                     |
| <i>Blastomyces dermatitidis</i> | Growth                             | No growth                          | N/A                     | No growth                                     |
| <i>Scedosporium apiospermum</i> | No growth                          | No growth                          | N/A                     | No growth                                     |
| <i>Microsporum gypseum</i>      | No growth                          | No growth                          | N/A                     | No growth                                     |
| <i>Exophiala dermatitidis</i>   | No growth                          | No growth                          | N/A                     | No growth                                     |
| <i>Fusarium proliferatum</i>    | No growth                          | No growth                          | N/A                     | No growth                                     |
| <i>Candida auris</i>            | No growth                          | No growth                          | N/A                     | No growth                                     |
| <i>Cryptococcus neoformans</i>  | No growth                          | No growth                          | N/A                     | No growth                                     |
| <i>Coccidioides immitis</i>     | No growth                          | No growth                          | N/A                     | No growth                                     |
| <i>Candida haemulonii</i>       | No growth                          | No growth                          | N/A                     | No growth                                     |
| <i>Kodamaeae ohmeri</i>         | No growth                          | No growth                          | N/A                     | No growth                                     |
| <i>Candida lusitanae</i>        | No growth                          | No growth                          | N/A                     | No growth                                     |
| <i>Acremonium spp.</i>          | No growth                          | No growth                          | N/A                     | No growth                                     |
| <i>Aspergillus terreus</i>      | No growth                          | No growth                          | N/A                     | No growth                                     |
| <i>Candida albicans</i>         | No growth                          | No growth                          | N/A                     | No growth                                     |
| <i>Scedosporium prolificans</i> | No growth                          | No growth                          | N/A                     | No growth                                     |
| <i>Trichophyton tonsurans</i>   | No growth                          | No growth                          | N/A                     | No growth                                     |
| <i>Cryptococcus gattii</i>      | No growth                          | No growth                          | N/A                     | No growth                                     |
| <i>Rhizopus spp.</i>            | No growth                          | No growth                          | N/A                     | No growth                                     |

EtOH=Ethanol, N/A=Not Applicable

Organisms incubated for 4 weeks before determined to be "No growth", except for *B. dermatitidis* which was incubated for 6 weeks.

**Supplemental Table S3. Sequencing run QC metrics and results.**

| Metric                 | Passing Criteria | Comment            | Average (SD)         | Pass Rate (%)            |
|------------------------|------------------|--------------------|----------------------|--------------------------|
| % PF                   | ≥60%             | Mandatory criteria | 97 (3)               | 100% (20/20)             |
| Evenness of % PF       | ≥2% per sample   | Mandatory criteria | 8 (5)                | 99% (74/75) <sup>a</sup> |
| Calculated Total Reads | 1,000,000        | Mandatory criteria | 3027986<br>(1720534) | 99% (74/75) <sup>a</sup> |
| % Undetermined Reads   | <5%              | Optimal criteria   | 2 (0)                | 100% (20/20)             |
| Lane Density           | 1000±400         | Optimal criteria   | 980 (217)            | 90% (18/20)              |
| % >Q30 (Read 1)        | ≥60%             | Mandatory criteria | 90 (3)               | 100% (20/20)             |
| % >Q30 (Read 2)        | ≥60%             | Mandatory criteria | 95 (4)               | 100% (20/20)             |
| % >Q30 (Read 3)        | ≥60%             | Mandatory criteria | 94 (4)               | 100% (20/20)             |
| % >Q30 (Read 4)        | ≥60%             | Mandatory criteria | 80 (5)               | 100% (20/20)             |

<sup>a</sup> Isolate UCLA\_311 (*Sporothrix schenckii*) was excluded from the subsequent analyses because the % PF per sample was <2% (0.77%); the total reads were 277,700.

SD=Standard Deviation

PF=Passing Filter

**Supplemental Table S4. Isolate QC metrics and results.**

| Metric                          | Range           | Average (SD)      | QC Criteria |
|---------------------------------|-----------------|-------------------|-------------|
| <b>de novo Assembly:</b>        |                 |                   |             |
| N50                             | 1,446-1,191,171 | 141,681 (225,637) | None        |
| GC Content (%)                  | 33.00-60.50     | 47.54 (5.49)      | None        |
| <b>ITS Mapping:</b>             |                 |                   |             |
| Average Coverage                | 204-4622        | 982 (684)         | None        |
| 5X Coverage (%)                 | 66.16-100       | 98.67 (4.68)      | ≥80%        |
| 10X Coverage (%)                | 66.16-100       | 98.41 (5.19)      | ≥80%        |
| <b>28S Mapping (Mucorales):</b> |                 |                   |             |
|                                 | N=9             | N=9               |             |
| Average Coverage                | 448-2179        | 1098 (620)        | None        |
| 5X Coverage (%)                 | 99.43-100       | 99.81 (0.25)      | ≥80%        |
| 10X Coverage (%)                | 98.73-100       | 99.71 (0.44)      | ≥80%        |

SD=Standard Deviation

**Supplemental Table S5. In-house *Aspergillus* Reference Genomes**

| Species                             | Strain Identifier |
|-------------------------------------|-------------------|
| <i>Aspergillus aculeatus</i>        | ATCC16872         |
| <i>Aspergillus alliaceus</i>        | Aspalli1          |
| <i>Aspergillus amoenus</i>          | ASM981243v1       |
| <i>Aspergillus arachidicola</i>     | Aspara19utr       |
| <i>Aspergillus avenaceus</i>        | Aspave1           |
| <i>Aspergillus awamori</i>          | Aawm              |
| <i>Aspergillus bertholleticus</i>   | Aspber1           |
| <i>Aspergillus bombycis</i>         | ASM179269         |
| <i>Aspergillus brasiliensis</i>     | CBS101740         |
| <i>Aspergillus brunneoviolaceus</i> | Aspbbru1          |
| <i>Aspergillus caelatus</i>         | Aspcae1           |
| <i>Aspergillus calidoustus</i>      | Acal_Allpaths_LG  |
| <i>Aspergillus campestris</i>       | IBT28561          |
| <i>Aspergillus candidus</i>         | Aspcand1          |
| <i>Aspergillus carbonarius</i>      | ITEM5010          |
| <i>Aspergillus cejpai</i>           | ASM476916         |
| <i>Aspergillus chevalieri</i>       | JCM_23047         |
| <i>Aspergillus clavatus</i>         | NRRL1             |
| <i>Aspergillus coremiiformis</i>    | Aspcor1           |
| <i>Aspergillus costaricensis</i>    | Aspcos1           |
| <i>Aspergillus cristatus</i>        | ASM169335         |
| <i>Aspergillus ellipticus</i>       | Aspell1           |
| <i>Aspergillus eucalypticola</i>    | Aspeuc1           |
| <i>Aspergillus fijiensis</i>        | Aspfij1           |
| <i>Aspergillus fischeri</i>         | iNRRL181          |
| <i>Aspergillus flavus</i>           | NRRL3357          |
| <i>Aspergillus fumigatus</i>        | A1163             |

|                                      |                |
|--------------------------------------|----------------|
| <i>Aspergillus fumigatus</i>         | Af293          |
| <i>Aspergillus glaucus</i>           | CBS516.65      |
| <i>Aspergillus hancockii</i>         | ASM169659      |
| <i>Aspergillus heteromorphus</i>     | Asphet1        |
| <i>Aspergillus homomorphus</i>       | Asphom1        |
| <i>Aspergillus ibericus</i>          | Aspibe1        |
| <i>Aspergillus indologenus</i>       | Aspind1        |
| <i>Aspergillus japonicus</i>         | Aspjap1        |
| <i>Aspergillus kawachii</i>          | IFO4308        |
| <i>Aspergillus lentulus</i>          | Alt_assembly01 |
| <i>Aspergillus leporis</i>           | Asplep1        |
| <i>Aspergillus luchuensis</i>        | CBS106.47      |
| <i>Aspergillus minisclerotigenes</i> | Aspmin1        |
| <i>Aspergillus mulundensis</i>       | ASM336962      |
| <i>Aspergillus neoellipticus</i>     | ASM311656      |
| <i>Aspergillus neoniger</i>          | Aspneo1        |
| <i>Aspergillus nidulans</i>          | FGSCA4         |
| <i>Aspergillus niger</i>             | ATCC1015       |
| <i>Aspergillus niger</i>             | ATCC13496      |
| <i>Aspergillus niger</i>             | CBS513-88      |
| <i>Aspergillus niger</i>             | N402ATCC64974  |
| <i>Aspergillus nomius</i>            | ASM120477v1    |
| <i>Aspergillus novofumigatus</i>     | IBT16806       |
| <i>Aspergillus novoparasiticus</i>   | Aspnovo1       |
| <i>Aspergillus ochraceoroseus</i>    | IBT24754       |
| <i>Aspergillus ochraceus</i>         | AoFc           |
| <i>Aspergillus olivimuriae</i>       | ASM371941      |
| <i>Aspergillus oryzae</i>            | RIB40          |
| <i>Aspergillus parasiticus</i>       | Asppar1        |



|                                         |                |
|-----------------------------------------|----------------|
| <i>Aspergillus persii</i>               | ASM221596      |
| <i>Aspergillus piperis</i>              | Asppip1        |
| <i>Aspergillus pseudocaelatus</i>       | Asppsec1       |
| <i>Aspergillus pseudonomius</i>         | Asppsen1       |
| <i>Aspergillus pseudotamarii</i>        | Asppset1       |
| <i>Aspergillus pseudoterreus</i>        | ASM292700      |
| <i>Aspergillus rambellii</i>            | ASM98664       |
| <i>Aspergillus ruber</i>                | Eurhe1         |
| <i>Aspergillus saccharolyticus</i>      | Aspsac1        |
| <i>Aspergillus sclerotialis</i>         | phiScl         |
| <i>Aspergillus sclerotiicarbonarius</i> | Aspsc1         |
| <i>Aspergillus sclerotioniger</i>       | Aspscl1        |
| <i>Aspergillus sclerotiorum</i>         | HBR18v1        |
| <i>Aspergillus sergii</i>               | Aspser1        |
| <i>Aspergillus sojae</i>                | ASM827498v1    |
| <i>Aspergillus spinulosporus</i>        | ASM357481      |
| <i>Aspergillus steynii</i>              | IBT23096       |
| <i>Aspergillus sydowii</i>              | CBS593.65      |
| <i>Aspergillus taichungensis</i>        | Asptaic1       |
| <i>Aspergillus tamarii</i>              | Asptam1        |
| <i>Aspergillus tanneri</i>              | ASM342696      |
| <i>Aspergillus terreus</i>              | NIH2624        |
| <i>Aspergillus thermomutatus</i>        | ASM223726      |
| <i>Aspergillus transmontanensis</i>     | Asptr1         |
| <i>Aspergillus tritici</i>              | ASM981242v1    |
| <i>Aspergillus tubingensis</i>          | CBS134.48      |
| <i>Aspergillus turcosus</i>             | ASM223496      |
| <i>Aspergillus udagawae</i>             | Aud_assembly01 |
| <i>Aspergillus unguis</i>               | ASM332417      |

|                                   |              |
|-----------------------------------|--------------|
| <i>Aspergillus ustus</i>          | Austus1.0    |
| <i>Aspergillus uvarum</i>         | Aspuva1      |
| <i>Aspergillus vadensis</i>       | Aspvad1      |
| <i>Aspergillus versicolor</i>     | CBS583.65    |
| <i>Aspergillus violaceofuscus</i> | Aspvio1      |
| <i>Aspergillus viridinutans</i>   | ASM436809    |
| <i>Aspergillus welwitschiae</i>   | Aspwel1      |
| <i>Aspergillus wentii</i>         | DTO134E9     |
| <i>Aspergillus westerdijkiae</i>  | ASM130734    |
| <i>Aspergillus zonata</i>         | CBS506.65    |
| <i>Aspergillus quadrilineatus</i> | ASM1330552v1 |

**Supplemental Table S6. Precision results.**

|                                            | WGS ID                      | ITS Region Query |              |
|--------------------------------------------|-----------------------------|------------------|--------------|
|                                            |                             | % Overlap        | % Similarity |
| <b>Precision (between run):</b>            |                             |                  |              |
| <b><i>C. immitis</i> (Mold_EXT_01)</b>     |                             |                  |              |
| Rep1                                       | <i>Coccidioides immitis</i> | 100              | 100          |
| Rep2                                       | <i>Coccidioides immitis</i> | 100              | 100          |
| Rep3                                       | <i>Coccidioides immitis</i> | 100              | 99.82        |
| <b><i>C. tropicalis</i> (Yeast_EXT_01)</b> |                             |                  |              |
| Rep1                                       | <i>Candida tropicalis</i>   | 100              | 100          |
| Rep2                                       | <i>Candida tropicalis</i>   | 100              | 100          |
| Rep3                                       | <i>Candida tropicalis</i>   | 100              | 100          |
| <b>Precision (within run):</b>             |                             |                  |              |
| <b><i>C. immitis</i></b>                   |                             |                  |              |
| Mold_EXT_01                                | <i>Coccidioides immitis</i> | 100              | 100          |
| Mold_EXT_02                                | <i>Coccidioides immitis</i> | 99.81            | 100          |
| Mold_EXT_03                                | <i>Coccidioides immitis</i> | 100              | 100          |
| <b><i>C. tropicalis</i></b>                |                             |                  |              |
| Yeast_EXT_01                               | <i>Candida tropicalis</i>   | 100              | 100          |
| Yeast_EXT_02                               | <i>Candida tropicalis</i>   | 100              | 100          |
| Yeast_EXT_03                               | <i>Candida tropicalis</i>   | 100              | 100          |

Strains used: *Coccidioides immitis* UCLA\_293, *Candida tropicalis* UCLA\_374

Mold\_EXT\_01, 02, and 03 are three unique preparations (sub-culture and DNA extraction) of *C. immitis*

Yeast\_EXT\_01, 02, and 03 are three unique preparations (sub-culture and DNA extraction) of *C. tropicalis*

**Supplemental Table S7. *In silico* validation of the Westerdijk Fungal Biodiversity Institute database using reference ITS sequences.**

|        | Organism                         | NCBI Accession | WGS ID                           | Query Result: %Overlap/%Similarity |           |
|--------|----------------------------------|----------------|----------------------------------|------------------------------------|-----------|
|        |                                  |                |                                  | ITS                                | 28S       |
| VAL_01 | <i>Bipolaris victoriae</i>       | NR_147489      | <i>Bipolaris victoriae</i>       | 100/100                            | N/A       |
| VAL_02 | <i>Curvularia lunata</i>         | NR_138223      | <i>Curvularia lunata</i>         | 100/100                            | N/A       |
| VAL_03 | <i>Exserohilum turcicum</i>      | NR_163537      | <i>Exserohilum turcicum</i>      | 100/100                            | N/A       |
| VAL_04 | <i>Trichophyton rubrum</i>       | NR_131330      | <i>Trichophyton rubrum</i>       | 100/100                            | N/A       |
| VAL_05 | <i>Microsporum audouinii</i>     | NR_144883      | <i>Microsporum audouinii</i>     | 100/100                            | N/A       |
| VAL_06 | <i>Epidermophyton floccosum</i>  | NR_131275      | <i>Epidermophyton floccosum</i>  | 100/100                            | N/A       |
| VAL_07 | <i>Blastomyces dermatitidis</i>  | NR_163503      | <i>Blastomyces dermatitidis</i>  | 100/100                            | N/A       |
| VAL_08 | <i>Histoplasma capsulatum</i>    | NR_149341      | <i>Histoplasma capsulatum</i>    | 99.62/100                          | N/A       |
| VAL_09 | <i>Coccidioides immitis</i>      | NR_157446      | <i>Coccidioides immitis</i>      | 100/100                            | N/A       |
| VAL_10 | <i>Aspergillus nidulans</i>      | NR_133684      | <i>Aspergillus spp.</i>          | 100/100                            | N/A       |
| VAL_11 | <i>Aspergillus fumigatus</i>     | NR_121481      | <i>Aspergillus spp.</i>          | 100/100                            | N/A       |
| VAL_12 | <i>Aspergillus flavus</i>        | NR_111041      | <i>Aspergillus spp.</i>          | 100/100                            | N/A       |
| VAL_13 | <i>Fusarium fujikuroi</i>        | NR_111889      | <i>Fusarium fujikuroi</i>        | 100/100                            | N/A       |
| VAL_14 | <i>Beauveria bassiana</i>        | NR_111594      | <i>Beauveria bassiana</i>        | 100/100                            | N/A       |
| VAL_15 | <i>Mucor indicus</i>             | NG_057878      | <i>Mucor indicus</i>             | N/A                                | 100/99.86 |
| VAL_16 | <i>Rhizopus oryzae</i>           | NG_056282      | <i>Rhizopus oryzae</i>           | N/A                                | 100/100   |
| VAL_17 | <i>Lichtheimia ramosa</i>        | NG_042518      | <i>Lichtheimia ramosa</i>        | N/A                                | 100/100   |
| VAL_18 | <i>Candida tropicalis</i>        | NR_111250      | <i>Candida tropicalis</i>        | 100/100                            | N/A       |
| VAL_19 | <i>Candida albicans</i>          | NR_125332      | <i>Candida albicans</i>          | 100/100                            | N/A       |
| VAL_20 | <i>Candida auris</i>             | NR_154998      | <i>Candida auris</i>             | 100/100                            | N/A       |
| VAL_21 | <i>Cryptococcus gattii</i>       | NR_165941      | <i>Cryptococcus gattii</i>       | 100/100                            | N/A       |
| VAL_22 | <i>Trichosporon coremiiforme</i> | NR_073249      | <i>Trichosporon coremiiforme</i> | 100/100                            | N/A       |

N/A=Not Applicable

**Supplemental Figure S1. CLCbio Workflow for Fungal Species Identification**

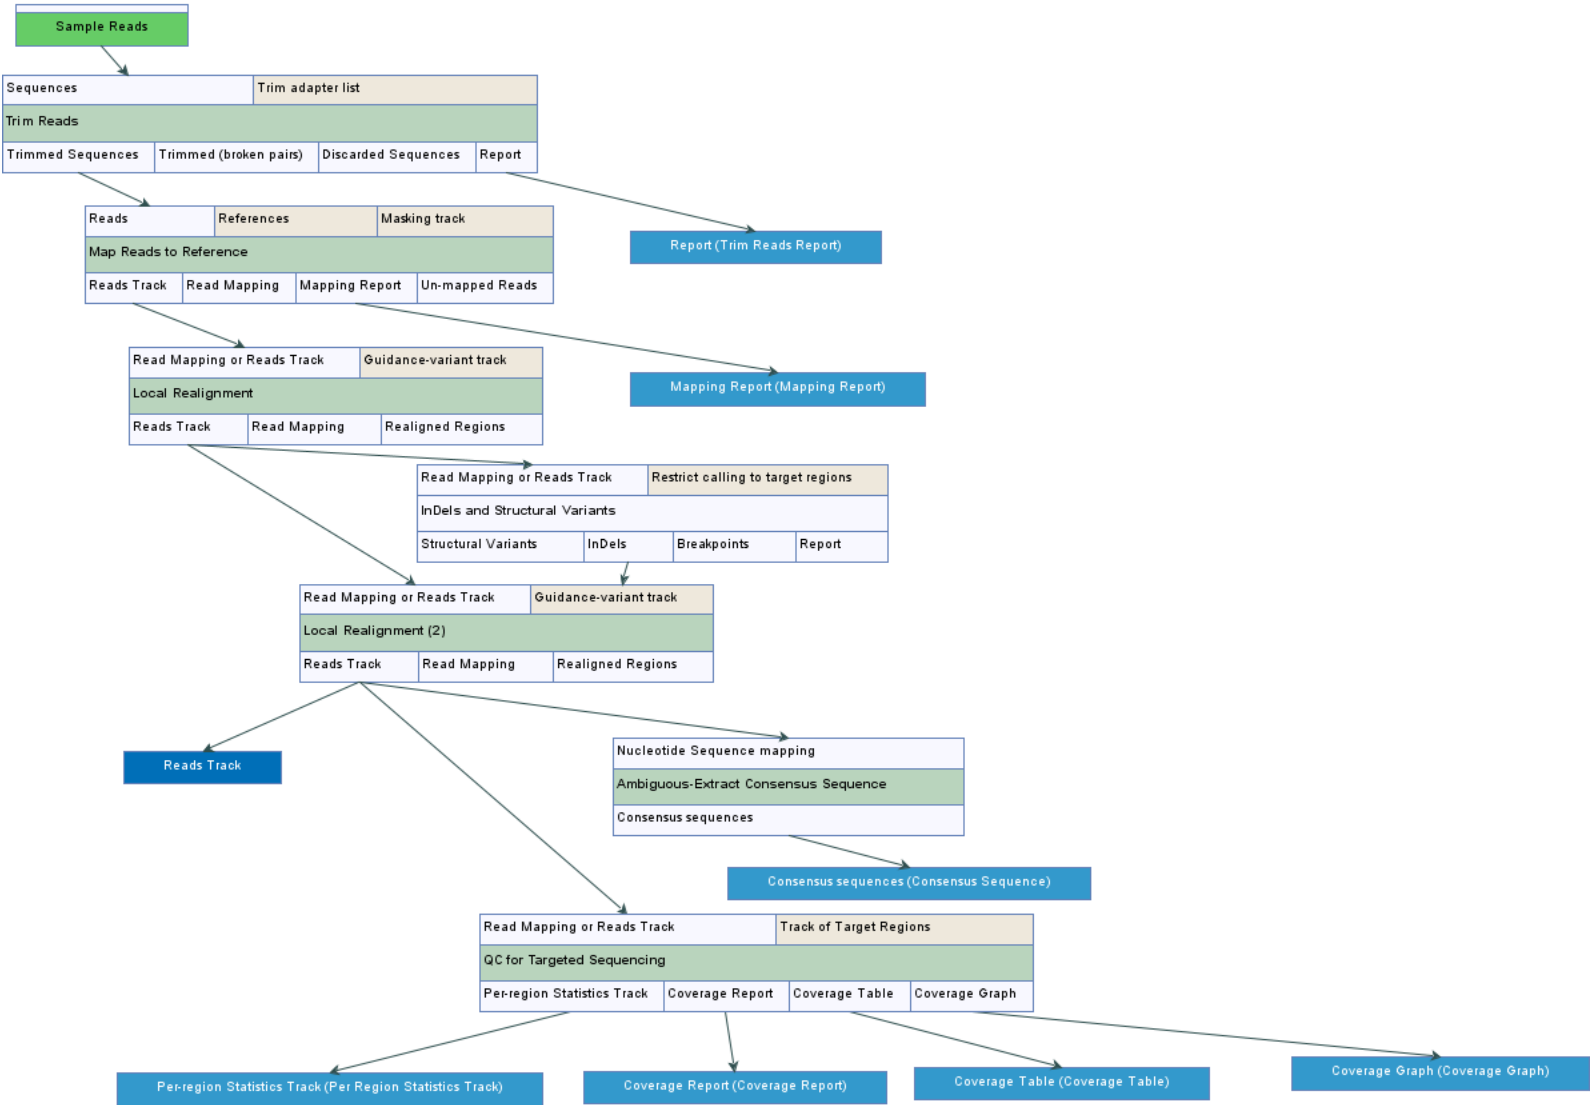

## Supplemental Figure S2. Examples of K-mer Tree Analysis for *Aspergillus*

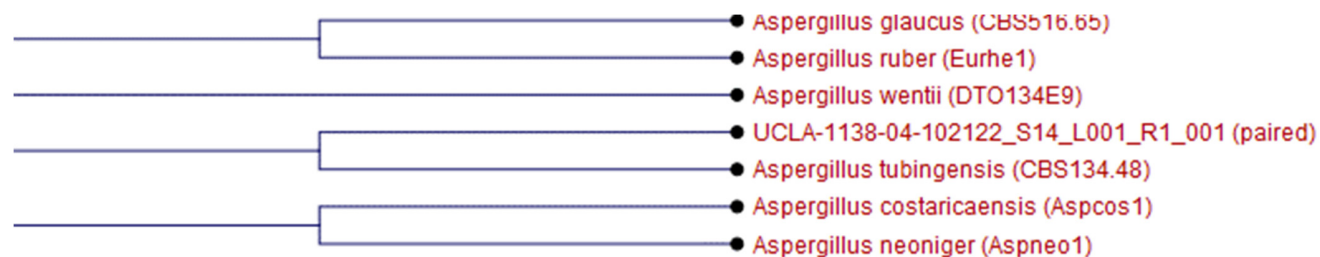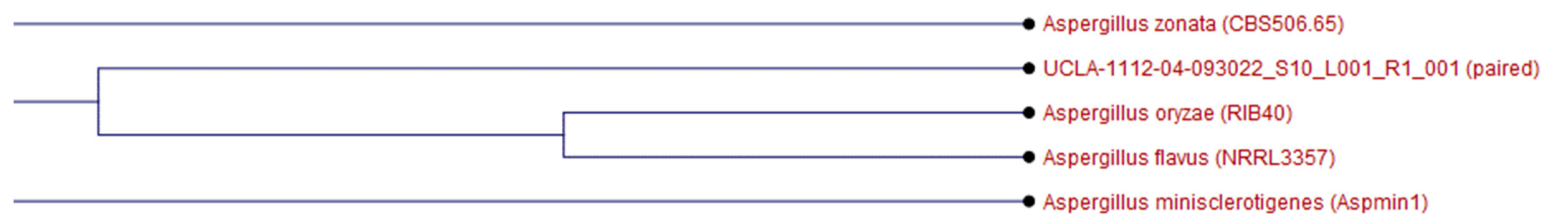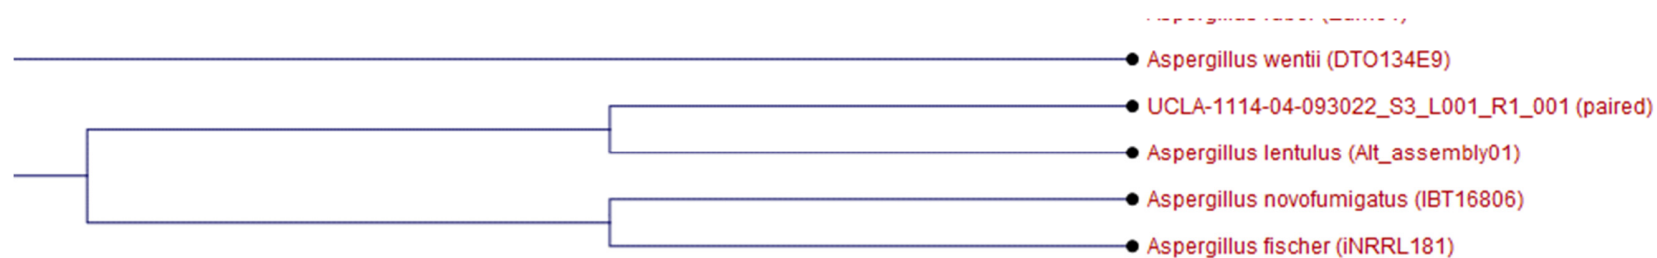

Supplement: s1 [file s1]
